# Supplementary material
Source: PubMed Central journal article supplement (PMC3308800)
Supplement: supp_M111.325803_jbc.M111.325803-1.pdf [file supp_M111.325803_jbc.M111.325803-1.pdf]

**Supplementary information for:**

Kailang Wu, Guiqing Peng, Matthew Wilken, Robert J. Geraghty, and Fang Li

**Mechanisms of Host Receptor Adaptation by SARS coronavirus**

Figure S1

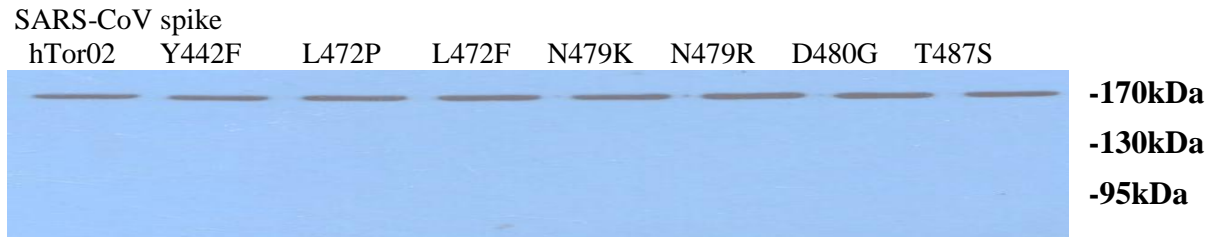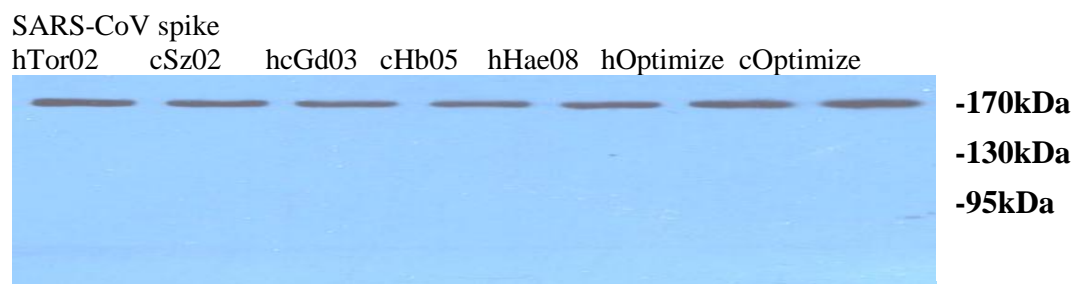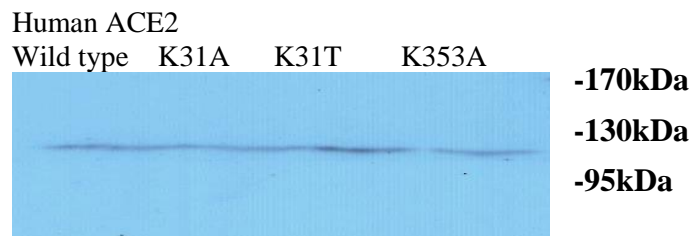

Expression levels of SARS-CoV spike proteins packaged in pseudotyped retroviruses and human ACE2 expressed on HEK293T cell surfaces. The SARS-spike proteins and human ACE2 contain C-terminal C9 tag and HA tag, respectively. The expression levels of the spike proteins and human ACE2 were detected by Western blotting using anti-C9 and anti-HA antibodies, respectively, and quantified using software Image J (version 1.6).
